# Supplementary material for: Translational response to mitochondrial stresses is orchestrated by tRNA modifications
Source: PubMed Central journal article supplement — bioRxiv. 2024 Feb 14:2024.02.14.580389. Preprint. [Version 1] doi: 10.1101/2024.02.14.580389 (PMC10888749; doi:10.1101/2024.02.14.580389), 2024-02-14

**Translational response to mitochondrial stresses is orchestrated by tRNA modifications.**

## Supplementary tables information

**Supplementary table 1:** Normalized peak areas of RNA modifications after stress exposure.

**Supplementary table 2:** Pathways used for codon analysis. Related to supplementary figure 7e.

**Supplementary table 3:** Normalized peak area of RNA modifications after ALKBH1 KO.

**Supplementary table 4:** Normalized peak areas of RNA modifications after serum deprivation or Queuine supplementation.

**Supplementary table 5:** Normalized peak area of RNA modifications after exposing QTRT1 (Q1), QTRT2 (Q2), or Double (Q3) KO cells to stress. AM: antimycin A. C: control. KCN: potassium cyanide. OLI: Oligomycin. Ro: Rotenone. TF: TTFA. As: Arsenite.

**Supplementary table 6:** Global targeted LC-MS/MS metabolomics analysis in tRNA-Q KO cells. Data presented as normalized peak areas.

**Supplementary table 7:** Global untargeted GC-MS/MS metabolomics analysis in tRNA-Q KO cells. Data presented as normalized peak areas.

**Supplementary table 8:** Targeted glutathione and transsulfuration pathway analysis via LC-MS/MS in tRNA-Q KO cells. Data presented as normalized peak areas.

**Supplementary table 9:** The transition list used in Agilent 6495 LC-MS/MS analysis of RNA modifications.

**Supplementary table 10:** The transition list used in Shimadzu 8050 LC-MS/MS analysis of RNA modifications.

## Supplementary figures

**Supplementary figure 1: Mitochondrial stress induces transcriptional and translational dysregulation (Supplementary to figure 2):** **a:** Gene UMAP from RNA-seq data. **b:** GOBP activation matrix from RNA-seq data. **c-e:** Volcano plot for differentially expressed genes in the Ribo-seq analysis. **f:** Cluster heatmap for the Ribo-seq data. **g:** GOBP activation matrix from the Ribo-seq data.

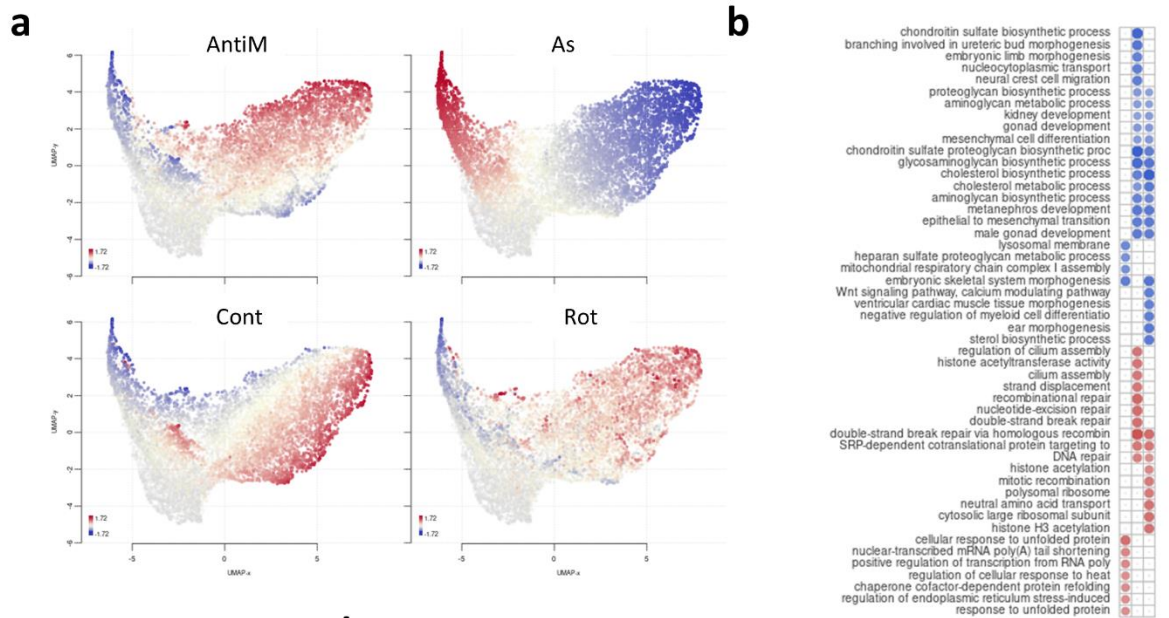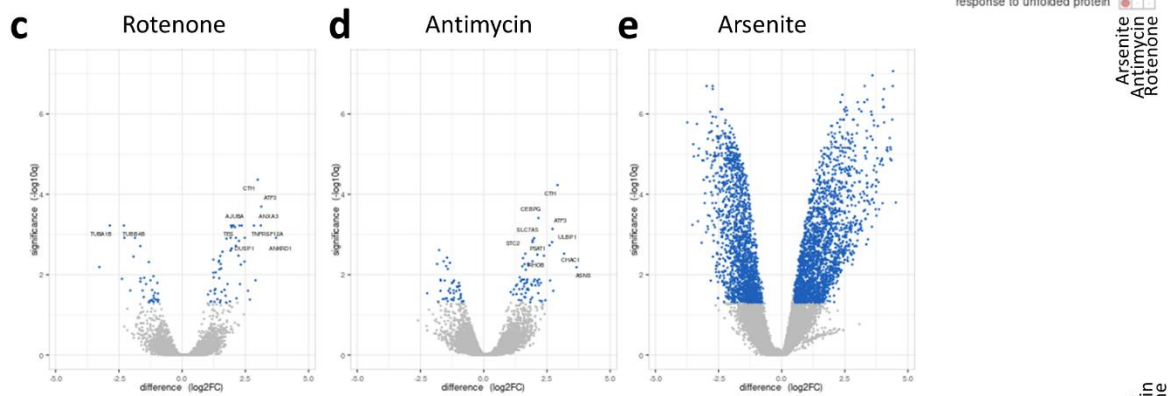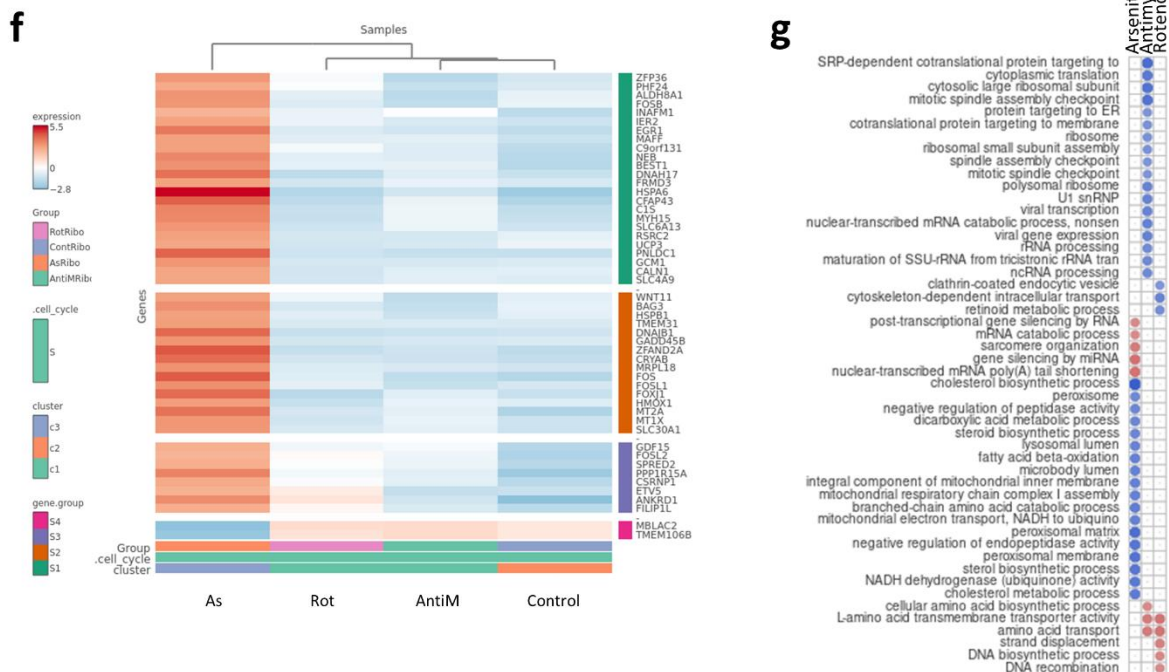

**Supplementary figure 2: Occupancy metagene plots after stress exposure. a-c:** Across CDS.  
**d-f:** Downstream from the start codon. **g-i:** Upstream from the stop codon.



**Supplementary figure 3: a:** Chemical structure for f5C and hm5C. **b:** expression of f5C in different stresses. Data presented as normalized peak areas. **c:** Expression of hm5C in different stresses. Asterisk: fold change > 1.5 and  $p < 0.05$ . **d:** Expression of various genes related to different respiratory chain complexes in the Ribo-seq dataset in different stresses.

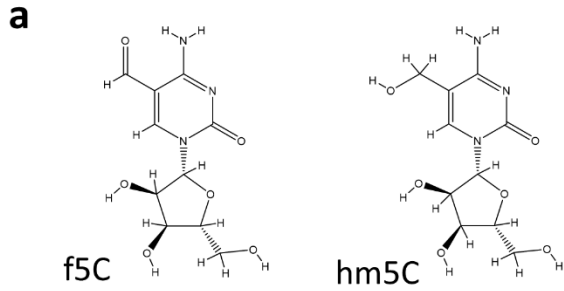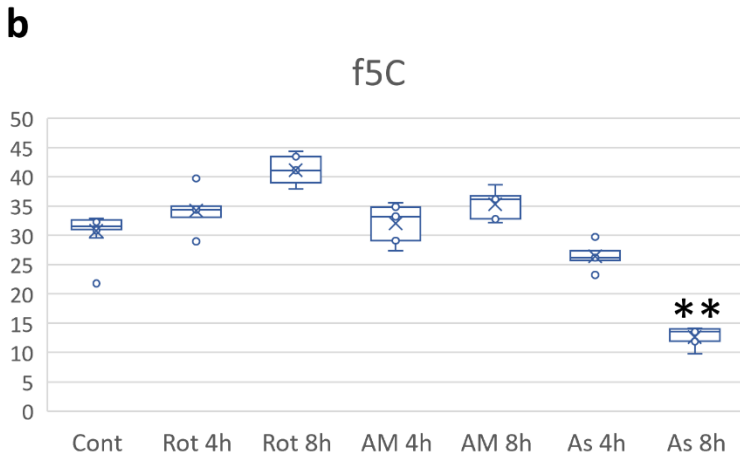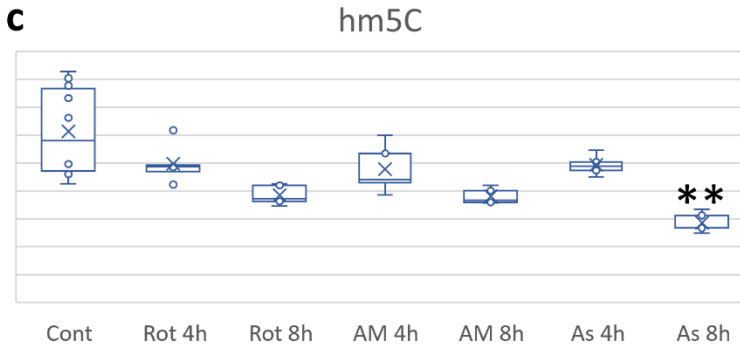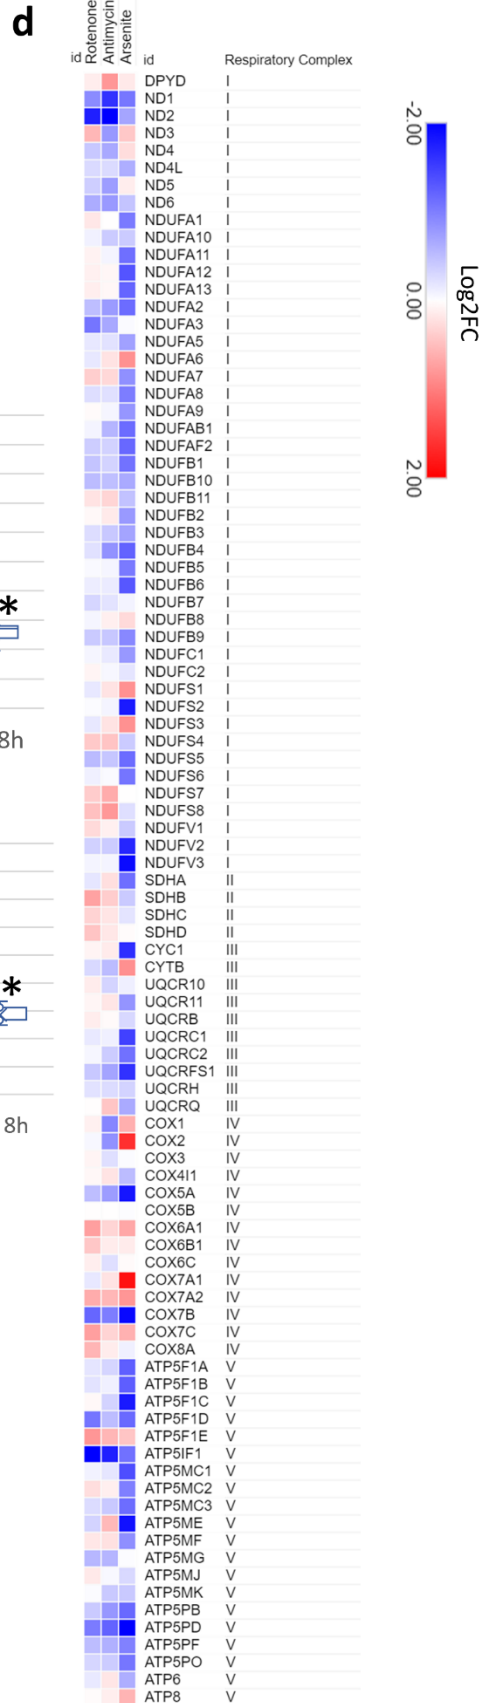



**Supplementary figure 4:** Structure and expression of tRNA modifications after stress exposure. **a-b:** mcm5U, **c-d:** Queuosine (tRNA-Q), **e-f:** manQ, and **g-h:** galQ. Data presented as normalized peak areas. Asterisk: fold change > 1.5 and  $p < 0.05$ .

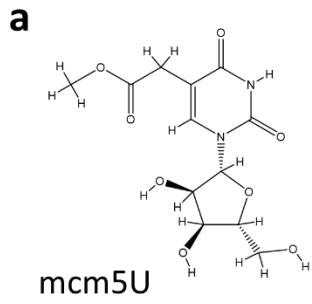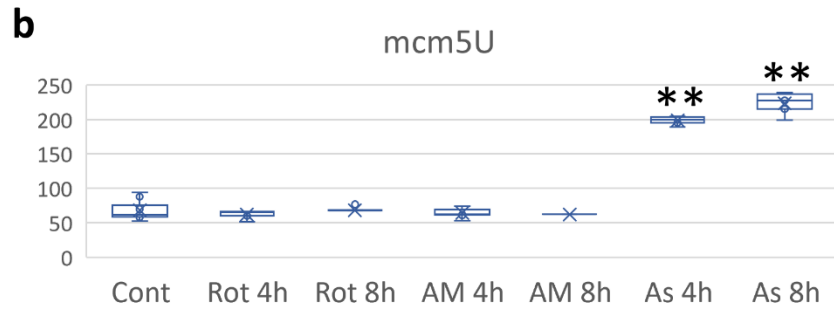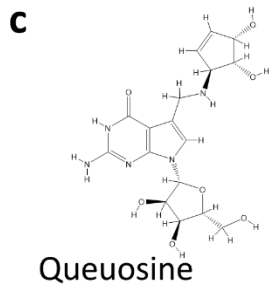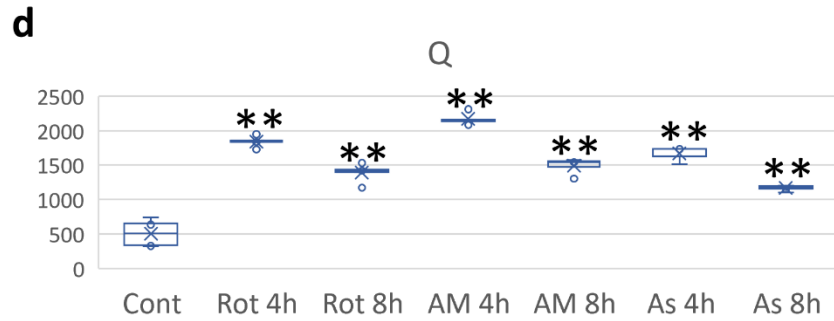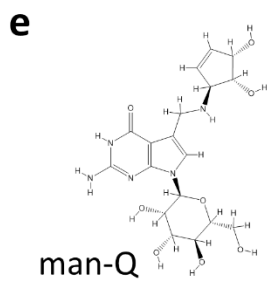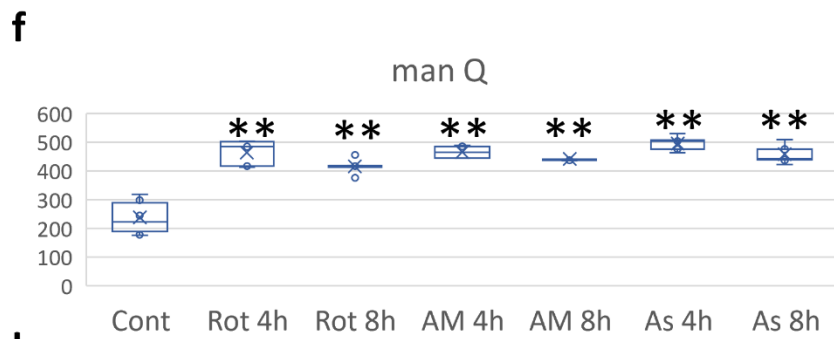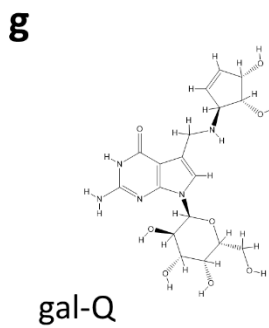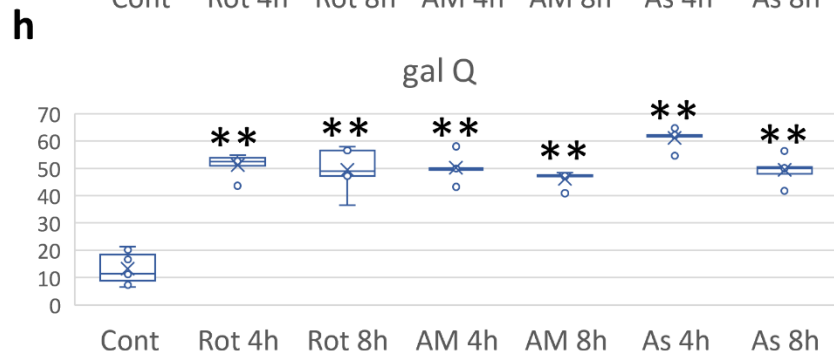

**Supplementary figure 5:** A-site pausing after stress exposure. Red asterisk: mcm5U codons. Black: NAC Q-codons. Orange: NAU Q-codons. Blue: hm5C codon.



**Supplementary figure 6: Analysis of codon changes after stress. a:** Pearson's correlation analysis across different datasets using isoacceptors codon frequencies as input. **b:** Isoacceptors codon frequency analysis of respiratory chain complex genes. **c:** Isoacceptors codon frequency analysis of selenoproteins detected in the sequencing analysis. **d:** Expression of selenoproteins in the Ribo-seq datasets. **e:** Pearson's correlation analysis using the expression of selenoproteins as input.



**Supplementary figure 7: Analysis of codon changes after stress (Cont.).** **a:** PLS-DA on selenoproteins using their expression in the arsenite Ribo-seq dataset after dividing them into up and down regulated and using isoacceptors frequencies as input. **b:** PLS-DA of the variables (codons) impacting selenoproteins expression. **c:** VIP analysis of codons contribution to selenoproteins expression using isoacceptors frequencies as input. **d:** VIP analysis of codons contribution to selenoproteins expression using total codon frequencies as input. **e:** Isoacceptors codon frequencies analysis of enriched pathways using the Ribo-seq datasets as input. **f:** PLS-DA on the enriched pathways using the isoacceptors codon frequencies as input. **g:** PLS-DA of the variables (codons) impacting pathway enrichment. **h:** VIP analysis of codons contribution to pathways enrichment using isoacceptors frequencies as input.

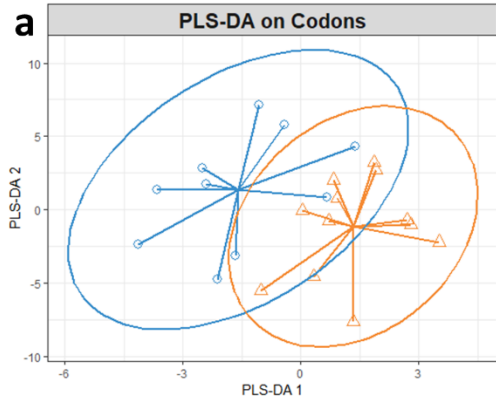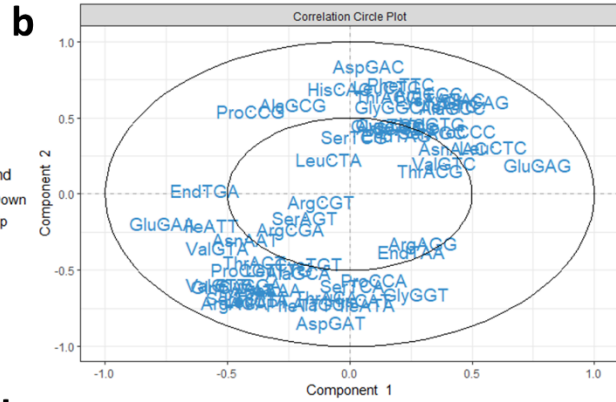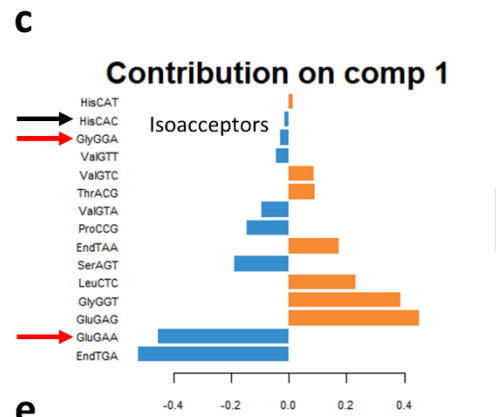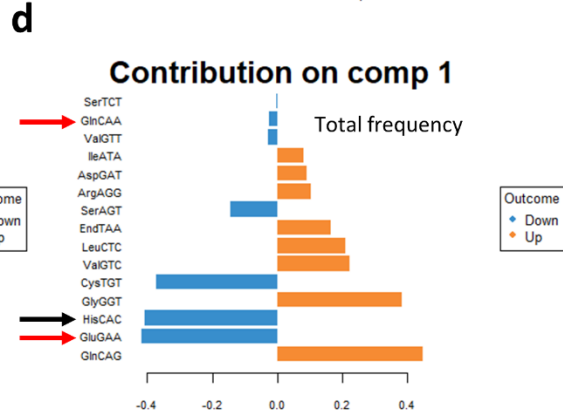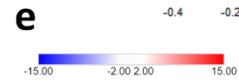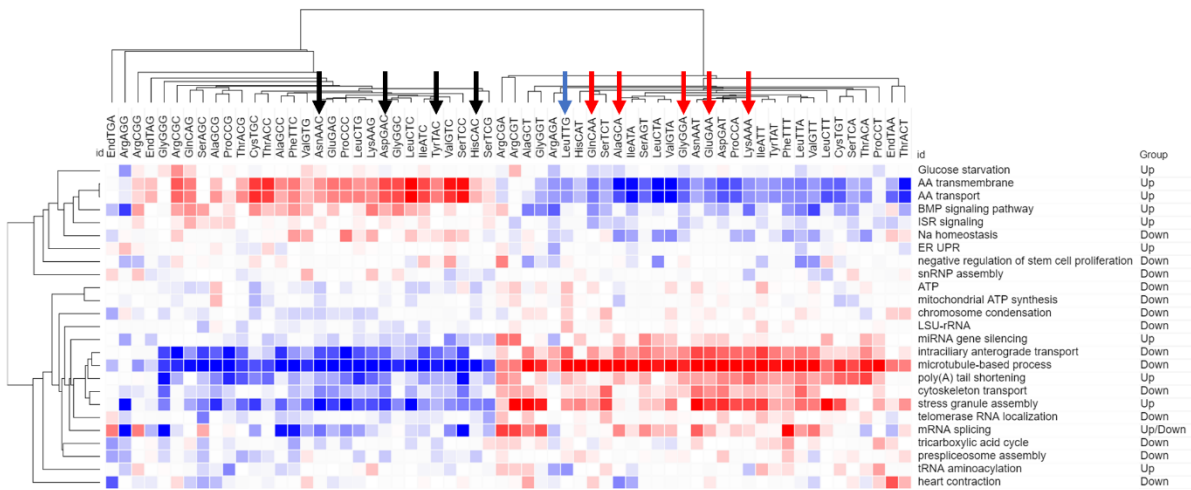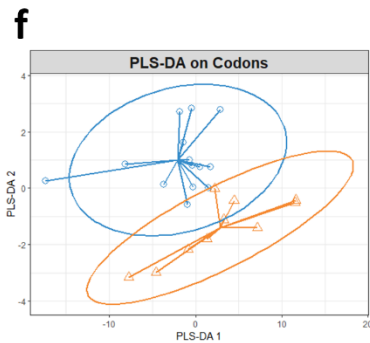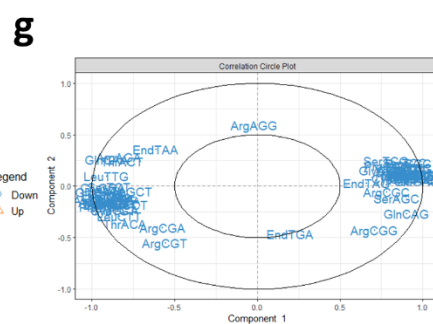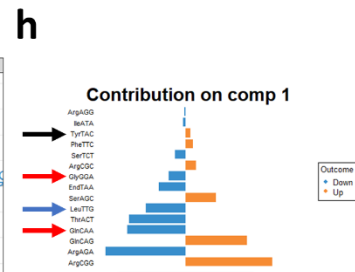



**Supplementary figure 8: ATF4 transcribed genes are G/C biased.** Enrichment of ATF4 pathway after Rotenone (**a**), antimycin A (**b**), or arsenite (**c**) exposure. **d**: Isoacceptors codon frequencies analysis of ATF4 transcribed genes retrieved from TRRUST database. **e**: Collected analysis of the ATF4 pathway represented as T-stat versus the genome average. **f**: Expression of different ATF4 transcribed genes in the Ribo-seq datasets.



**Supplementary figure 9: Impact of ALKBH1 on tRNA modifications.** LC-MS/MS spectral peaks after ALKBH1 KO (**a:** f5C, **b:** hm5Cm, and **c:** f5Cm). **d:** Cell viability after ALKBH1 KO and exposure to different ETC inhibitors for 4 hours (Rotenone 80 $\mu$ M, TTFA 1.5mM, Antimycin A 50 $\mu$ g/ml, Potassium Cyanide (KCN) 15mM, and Oligomycin 20 $\mu$ M) as well as Arsenite 600 $\mu$ M.

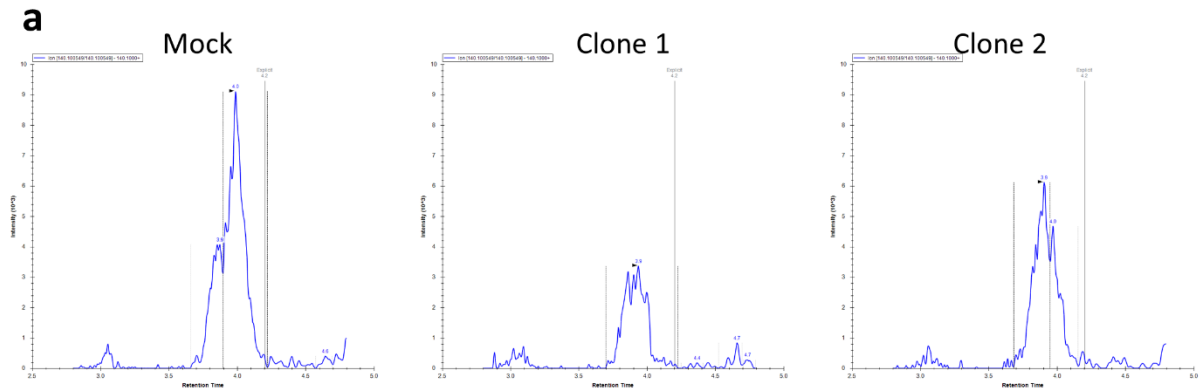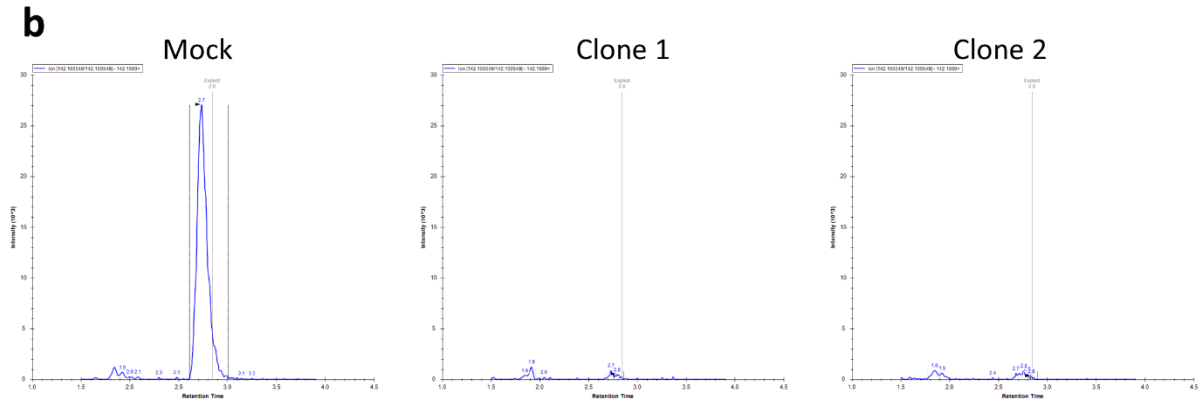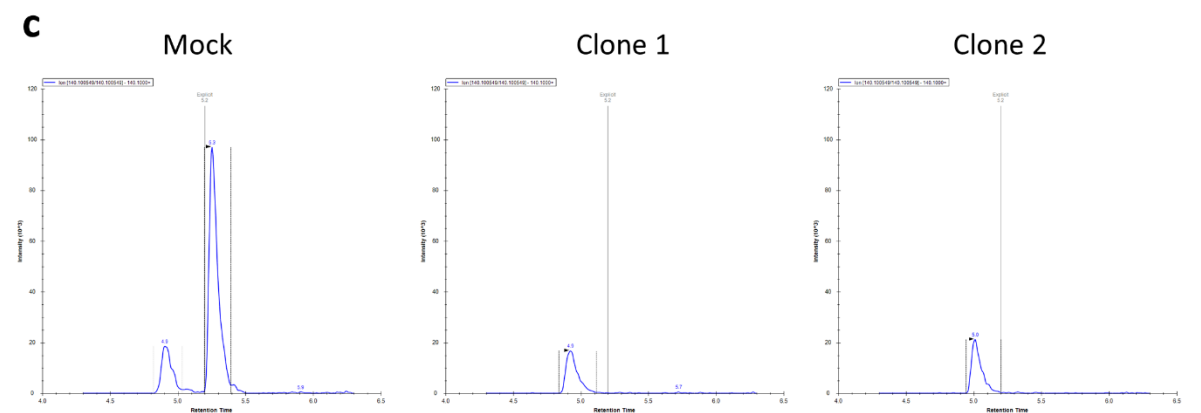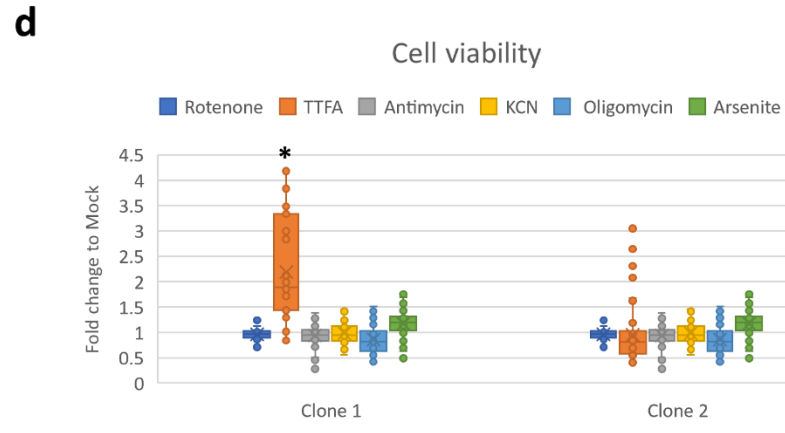

**Supplementary figure 10: ALKBH1 KO leads to translational stress. a:** Puromycin incorporation assay after ALKBH1 KO with quantification graph. **b:** Western blot of eIF2 $\alpha$  and its phosphorylated form (p- eIF2 $\alpha$ ). **c:** Quantification of eIF2 $\alpha$  and p- eIF2 $\alpha$  protein expression. **d:** Western blot of P38 and P70S6K and their phosphorylated forms (p-P38 and p-P70S6K). **e:** Quantification of P38 and p-P38 protein expression. **f:** Quantification of P70S6K and p-P70S6K protein expression. Asterisk: Fold change > 1.5 and  $p < 0.05$ .

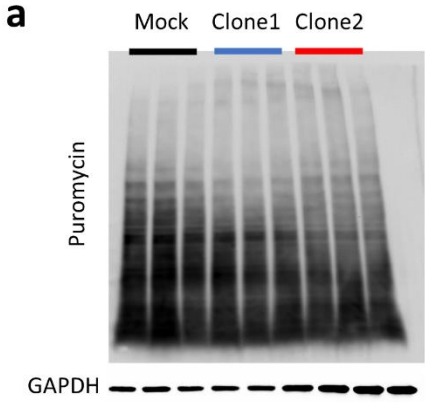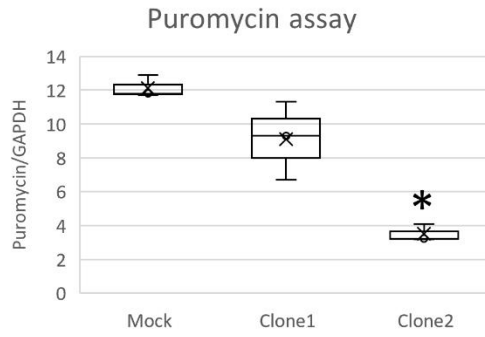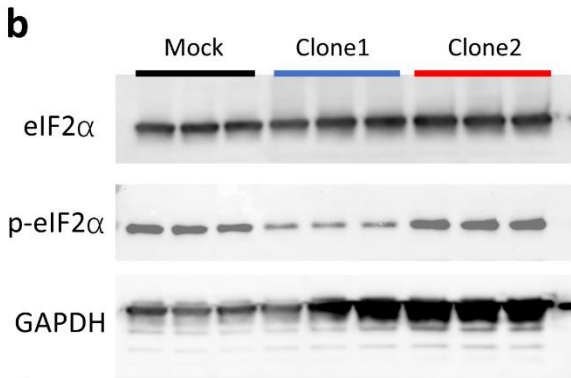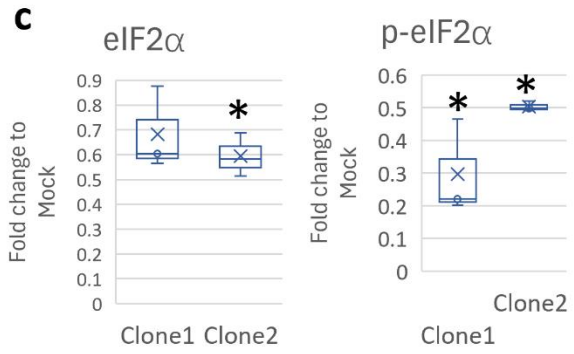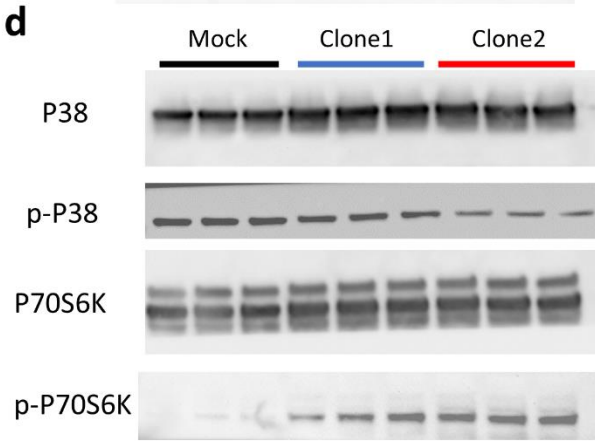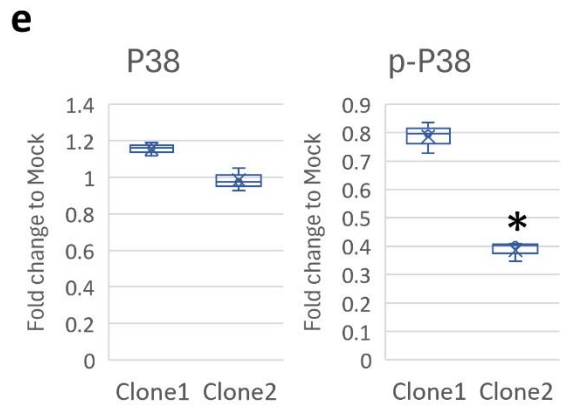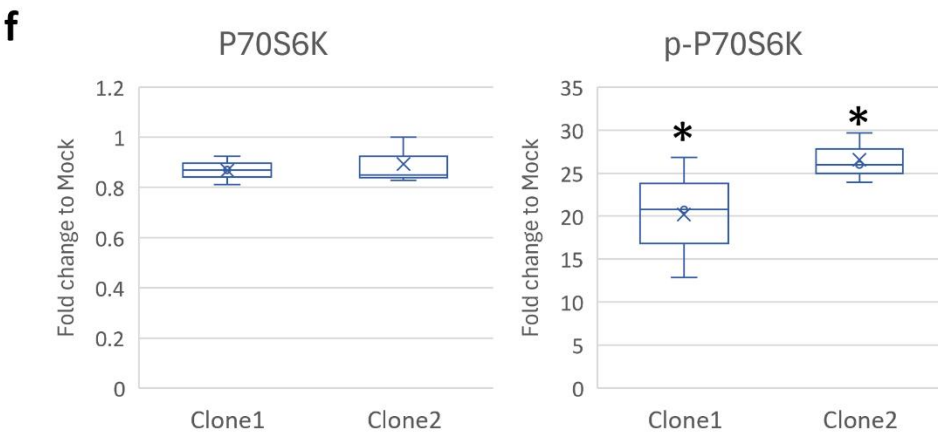

**Supplementary figure 11: ALKBH1 KO leads to mitochondrial dysfunction. a-h:** Different measurements derived from Seahorse assay. Asterisk:  $p < 0.05$ .

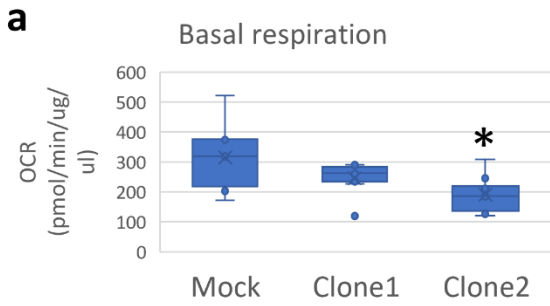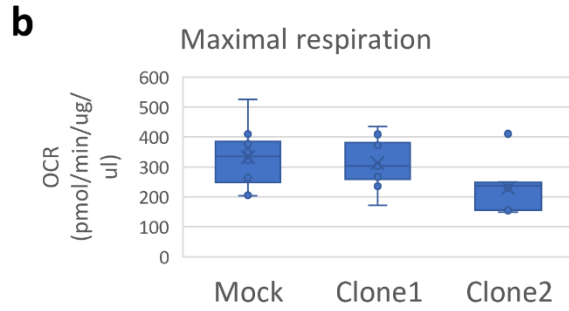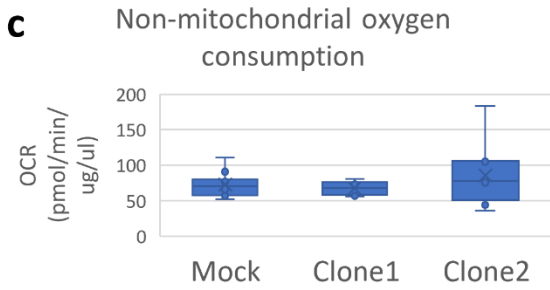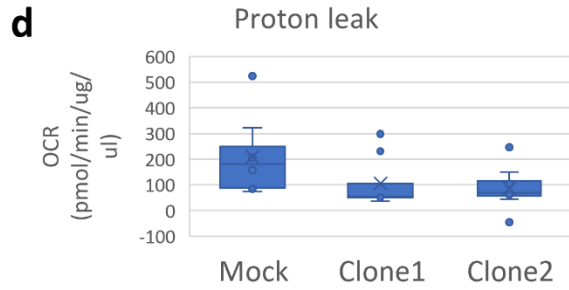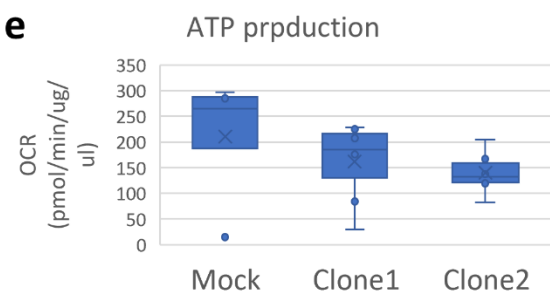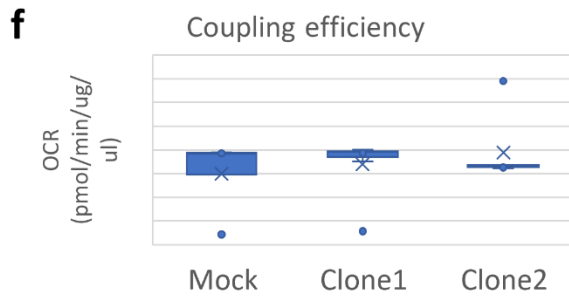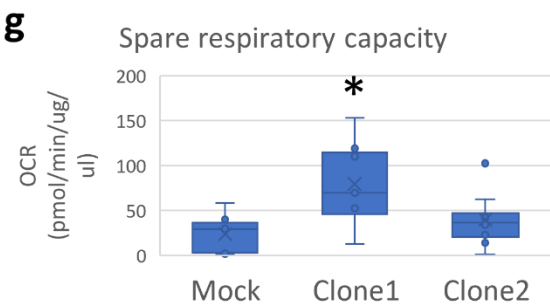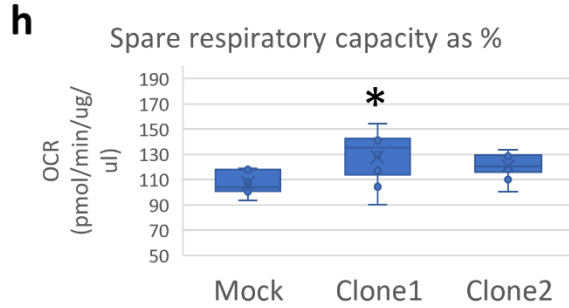



**Supplementary figure 12: tRNA-Q KO impacts tRNA modifications. a:** Protein expression of QTRT1 and QTRT2 after 8 hours of stress exposure in wild-type cells. **b:** T7 endonuclease assay to validate DNA cleavage after CRISPR KO induction. Lanes (from left): Mock, QTRT1 KO, QTRT2 KO, Double KO (QTRT1 primer), Double KO (QTRT2 primer). **c-d:** Mass spectrometry signals for manQ and galQ after QTRT1, QTRT2, or double KO. **e:** Puromycin incorporation assay. **f:** Quantification of western blot presented in figure 5g.

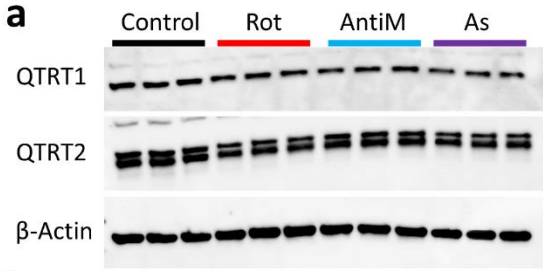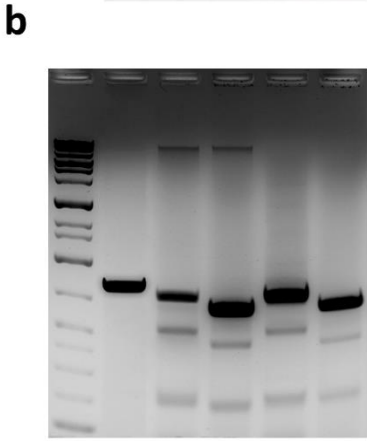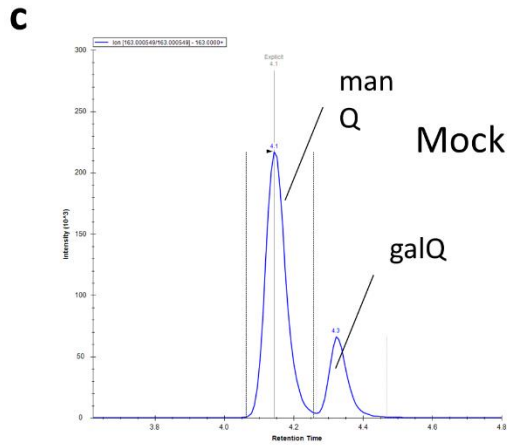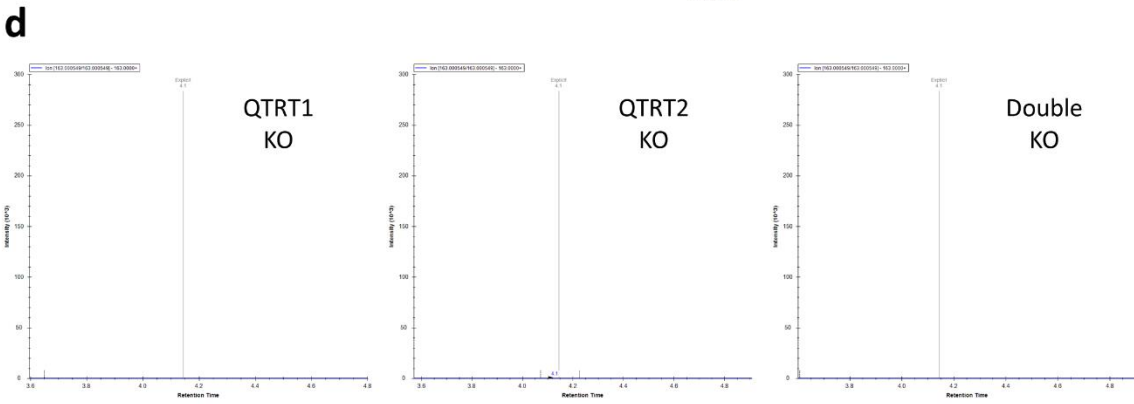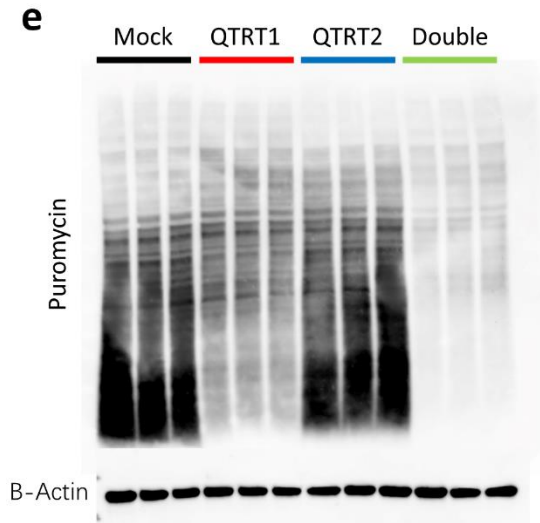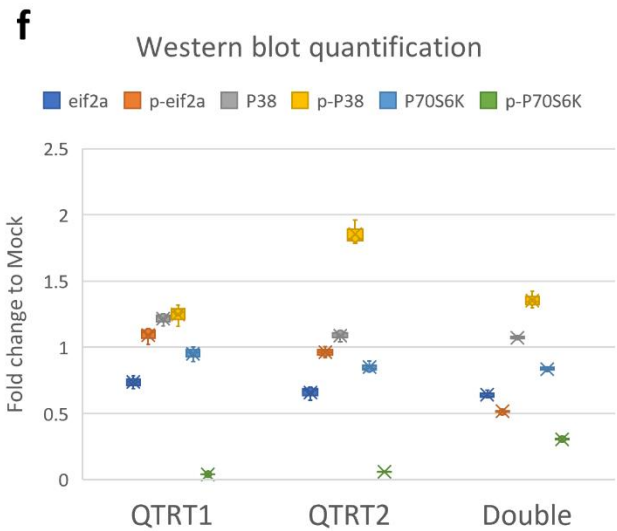

**Supplementary figure 13: a:** G3BP1 (a marker for SG) staining. **b:** EDC4 (a marker for P-bodies) staining and its quantification. Asterisk: fold change  $> 1.5$  and  $p < 0.05$ .

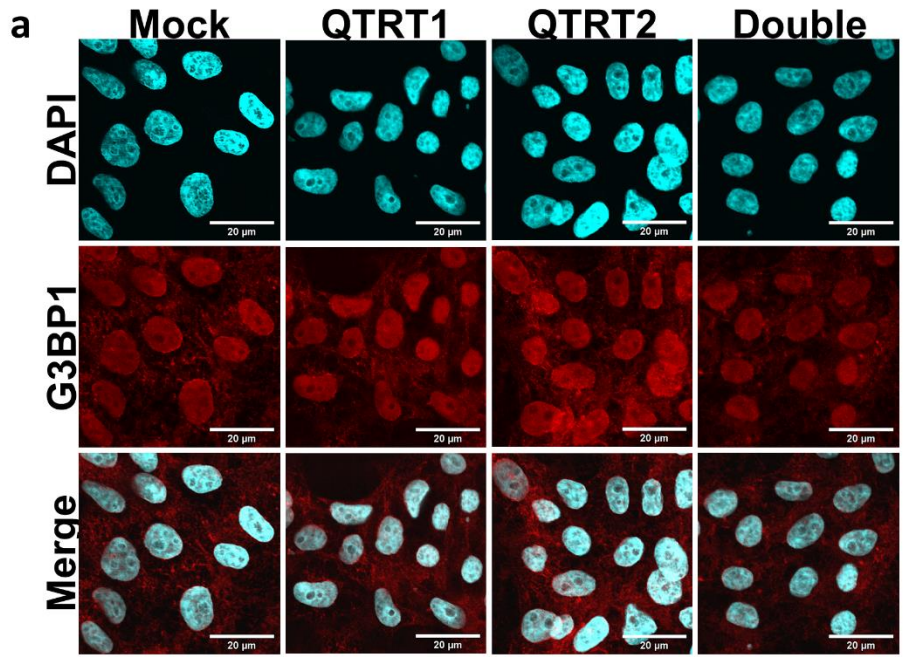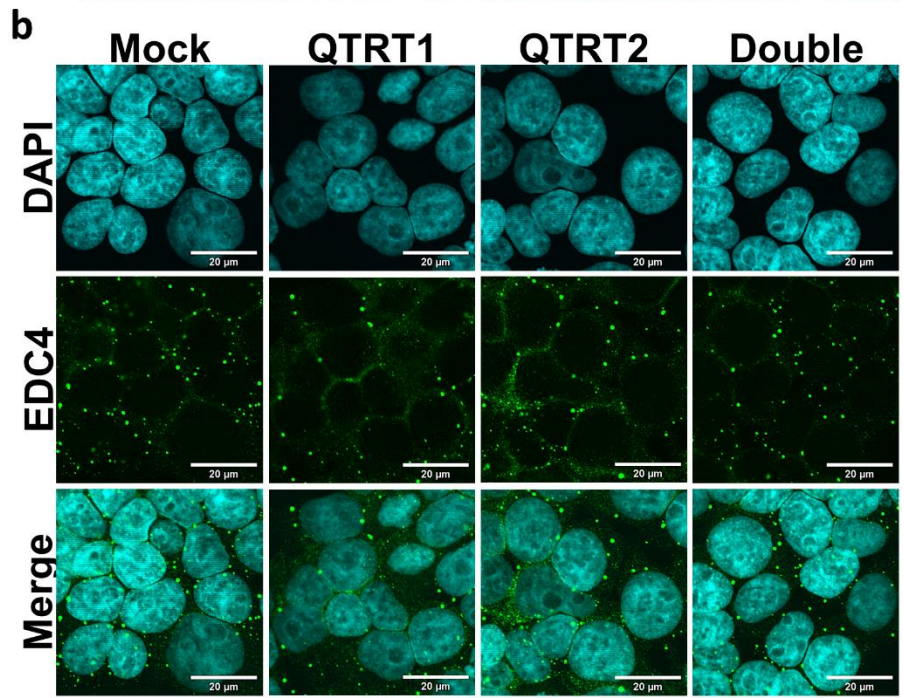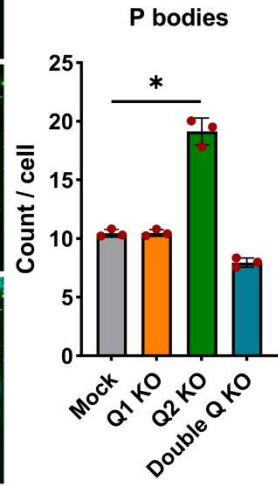

**Supplementary figure 14:** **a:** Isoacceptors codon frequencies in the Ribo-seq dataset. **b:** Total codon frequencies in the Ribo-seq dataset. **c:** Isoacceptors codon frequencies in the TE dataset. **d:** Total codon frequencies in the TE dataset.

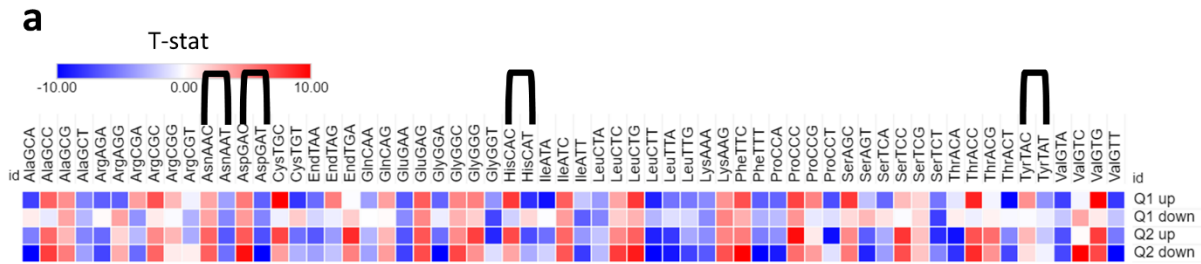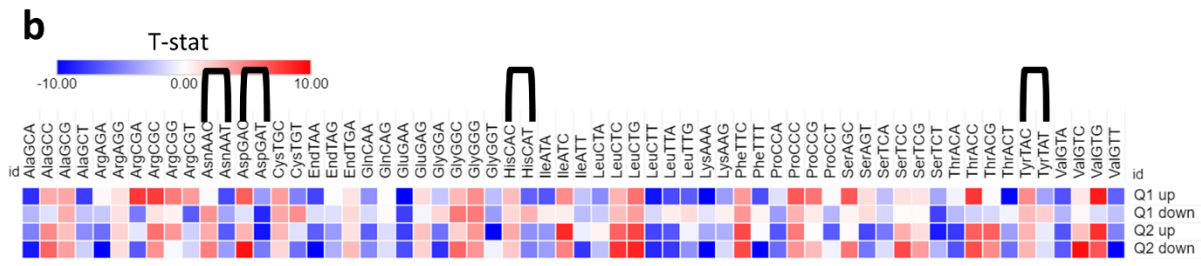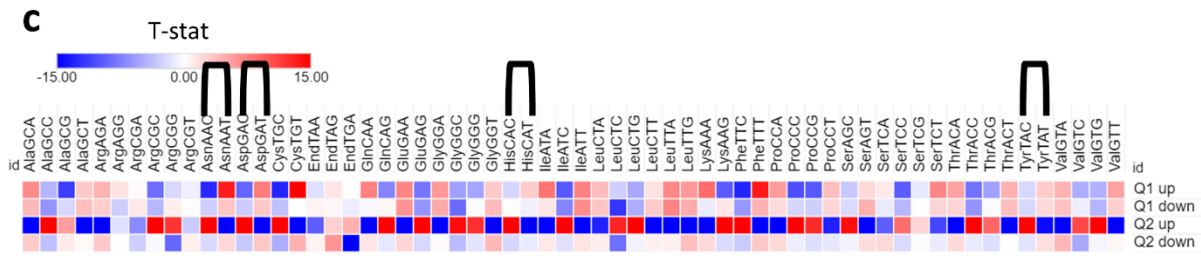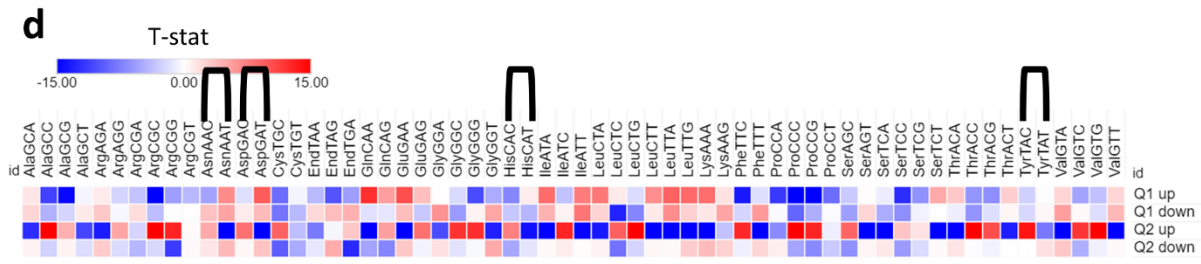

**Supplementary figure 15: tRNA-Q loss impacts mitochondrial function. a-b:** Western blot and quantification of different respiratory complex proteins in the KO cell lines. **c:** Live cell confocal imaging of Mito tracker red and green in the KO cell lines.

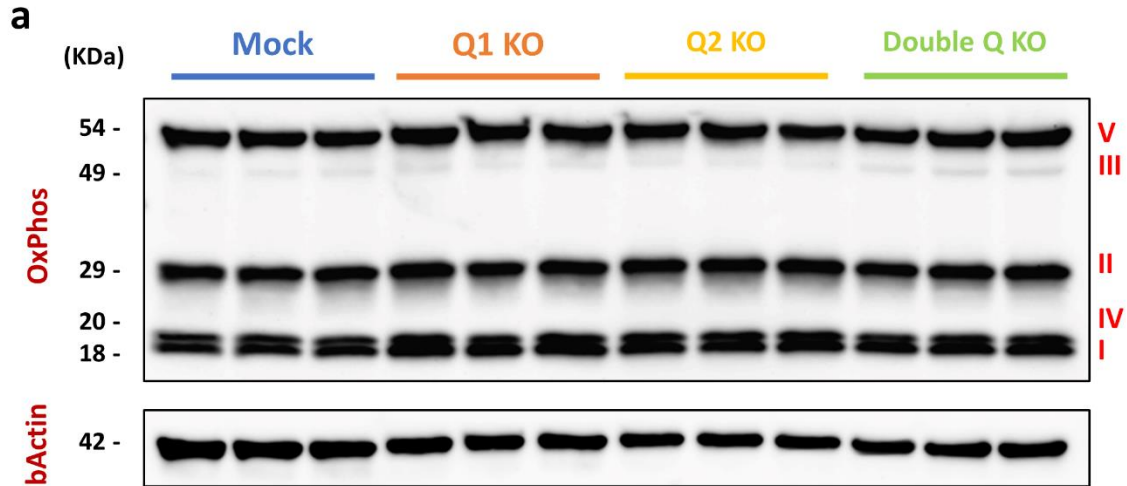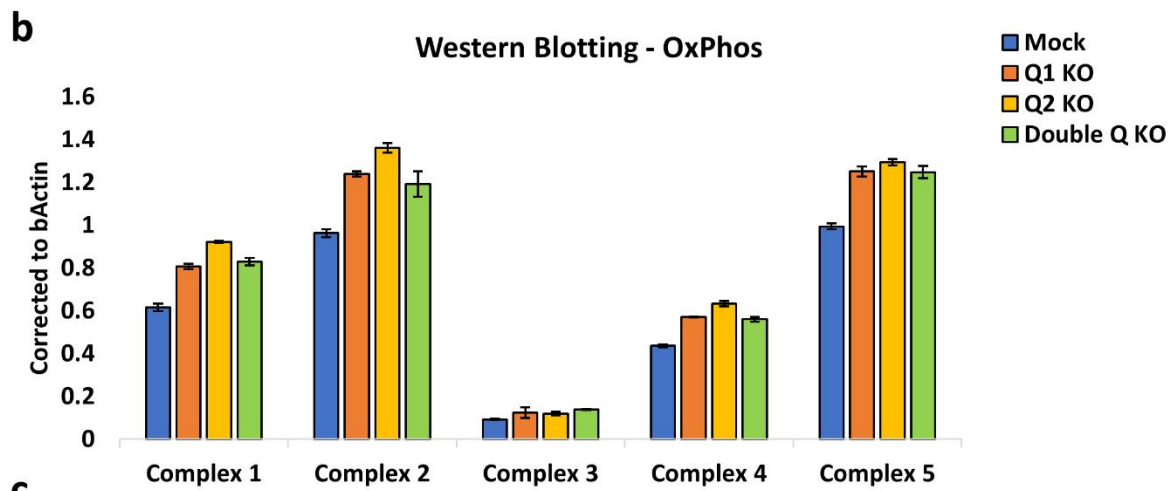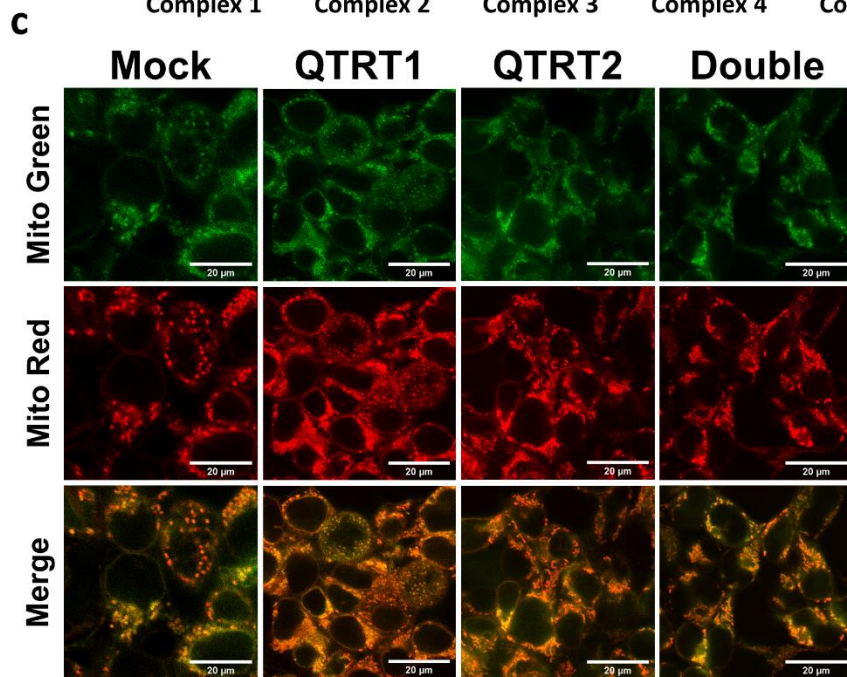



**Supplementary figure 16: tRNA-Q loss impacts mitochondrial function (Cont.) a:**

Mitochondrial respiration (oxygen consumption rate) analysis from Seahorse assay. **b-i:** Various readouts from the seahorse assay. Asterisk:  $p < 0.05$ .

**a**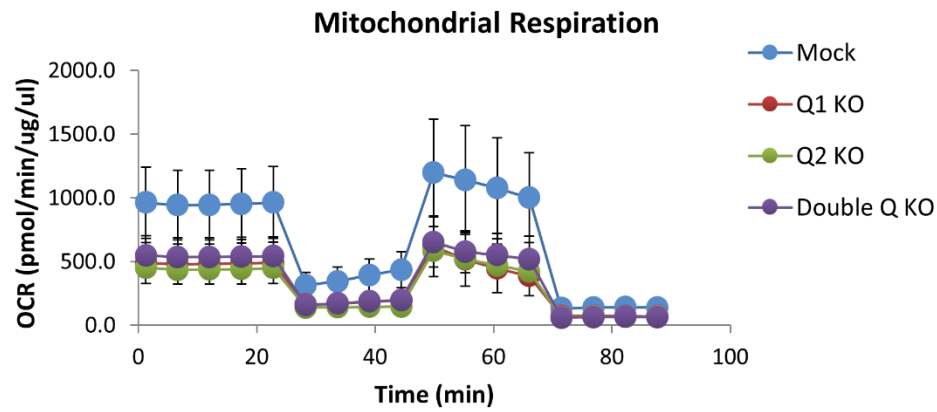**b**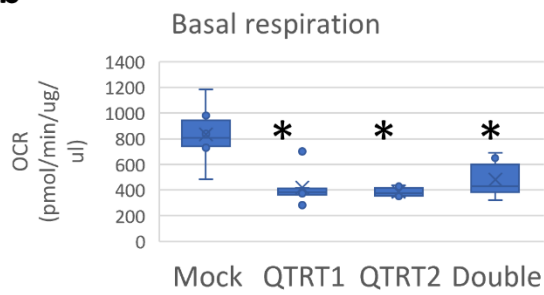**c**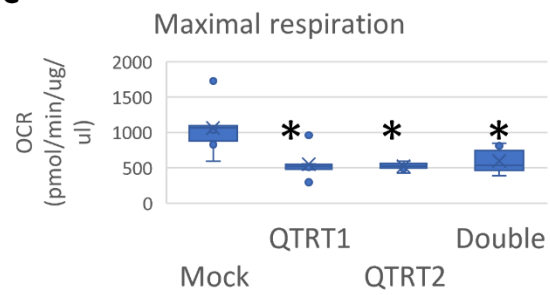**d**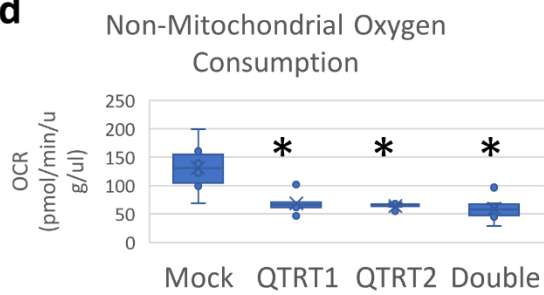**e**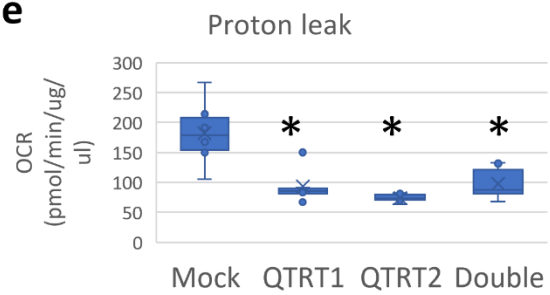**f**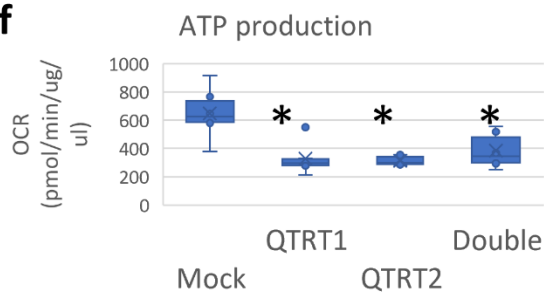**g**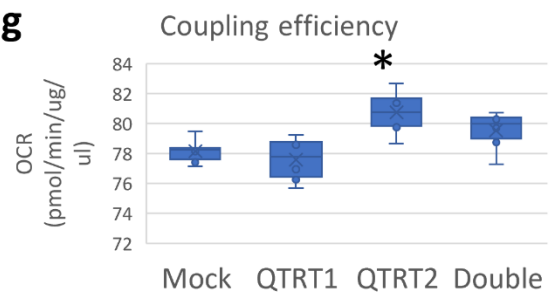**h**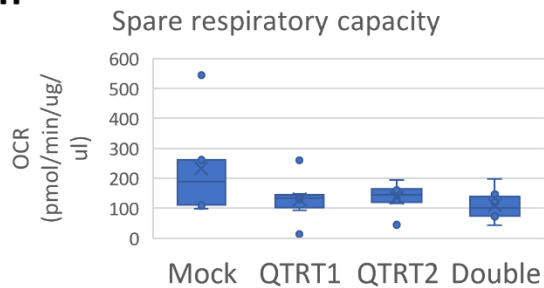**i**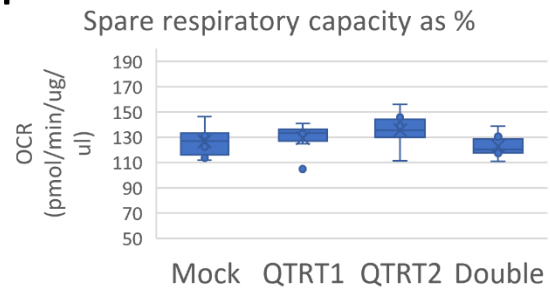

**Supplementary figure 17:** Cell viability analysis after stress exposure of tRNA-Q KO cell lines in different media. This data is detailed format for the heatmaps presented in figure 8a-d.

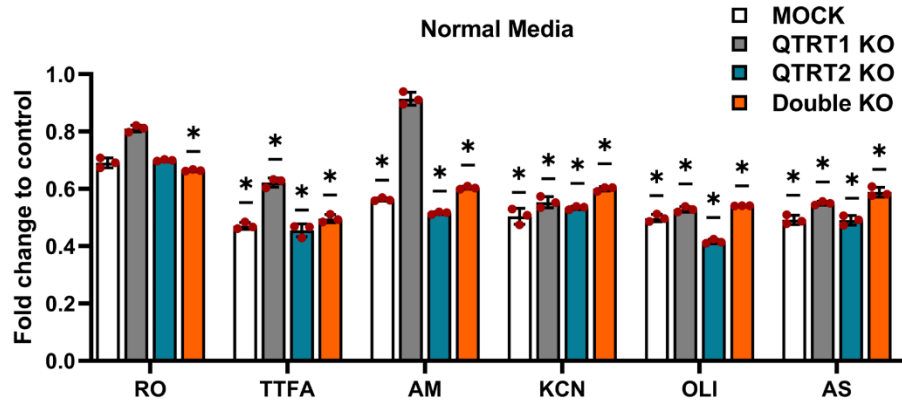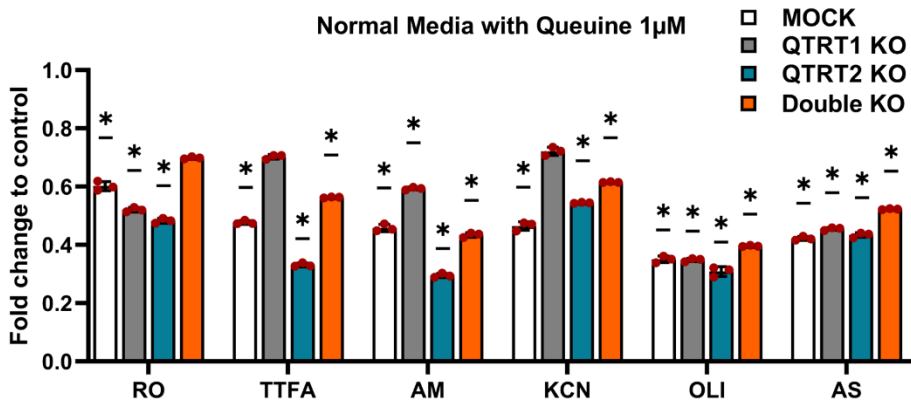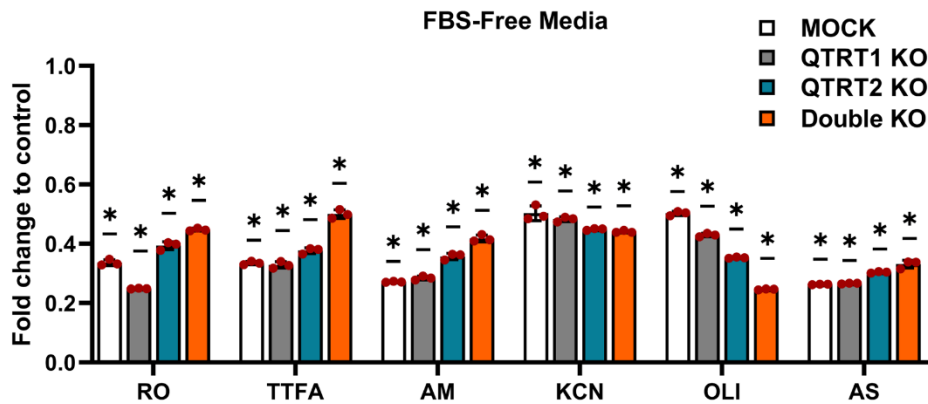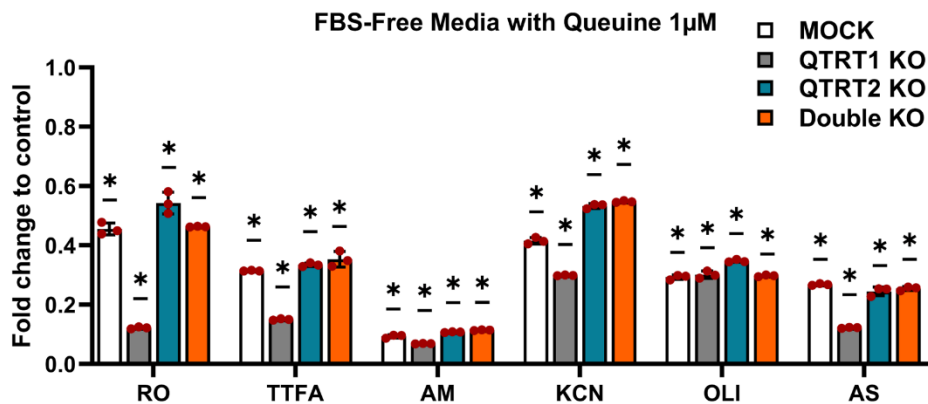

**Supplementary figure 18:** Mass spectrometry analysis of tRNA modifications after 4 hours of stress exposure of the tRNA-Q and Mock KO cell lines to ETC inhibitors (Rotenone 80 $\mu$ M, TTFA 1.5mM, Antimycin A 50 $\mu$ g/ml, Potassium Cyanide (KCN) 15mM, and Oligomycin 20 $\mu$ M) as well as Arsenite 600 $\mu$ M. Data represented as log<sub>2</sub> fold changes to the controls of each cell line. Asterisk: fold change > 1.5 and *p* < 0.05.

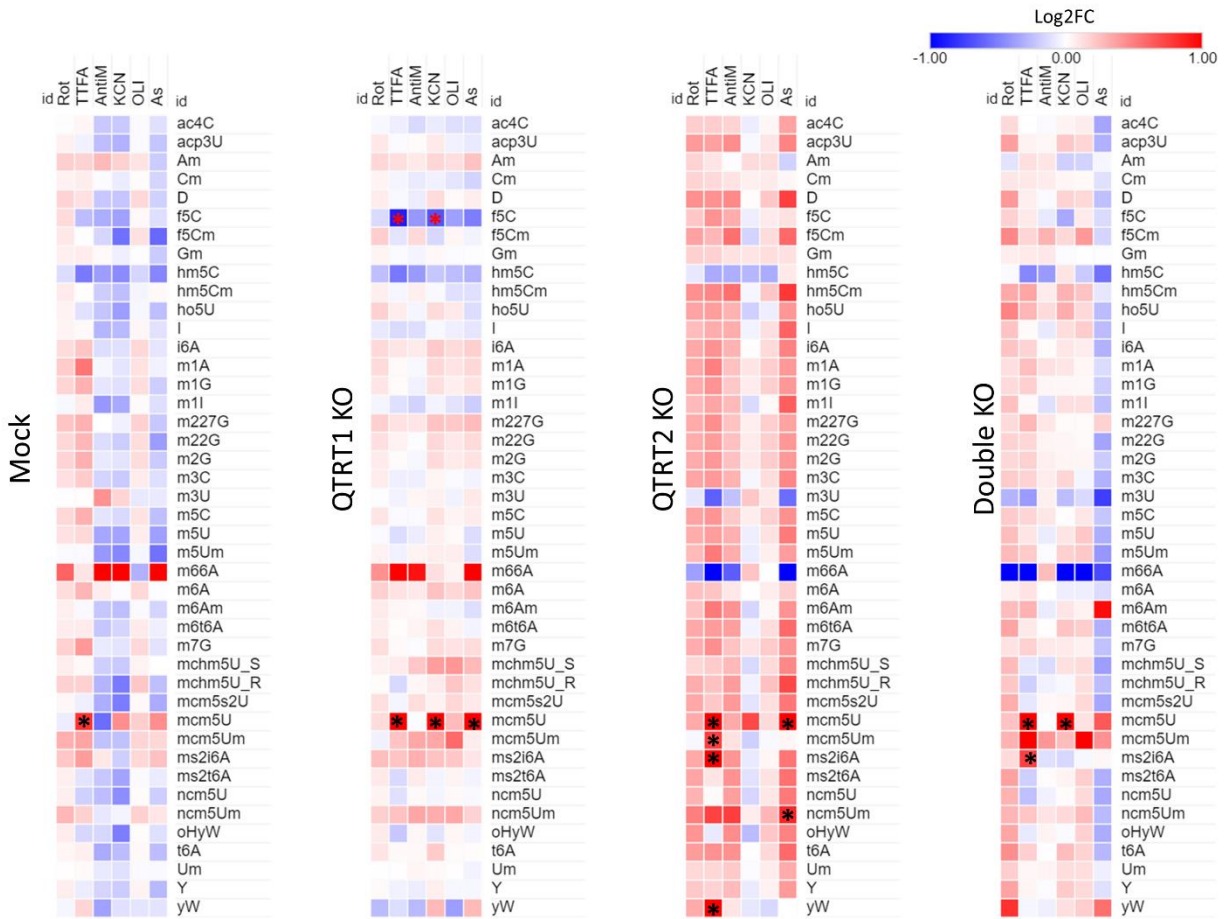

**Supplementary figure 19: Metabolomic analysis after tRNA-Q depletion.** **a:** LC-MS/MS based Targeted metabolomics. **b:** statistically significant metabolites on Anova (asterisk:  $FC > 1.5$ ,  $p < 0.05$  with Turkey's post hoc. **c:** GC-MS/MS based untargeted metabolomics. **d:** significant metabolites on ANOVA. Asterisk:  $FC > 1.5$ ,  $p < 0.05$  with Turkey's post hoc. **e:** GSH transsulfuration pathway analysis. Asterisk:  $FC > 1.5$ ,  $p < 0.05$  with Turkey's post hoc. **f:** Correlation analysis using all the metabolomics data.

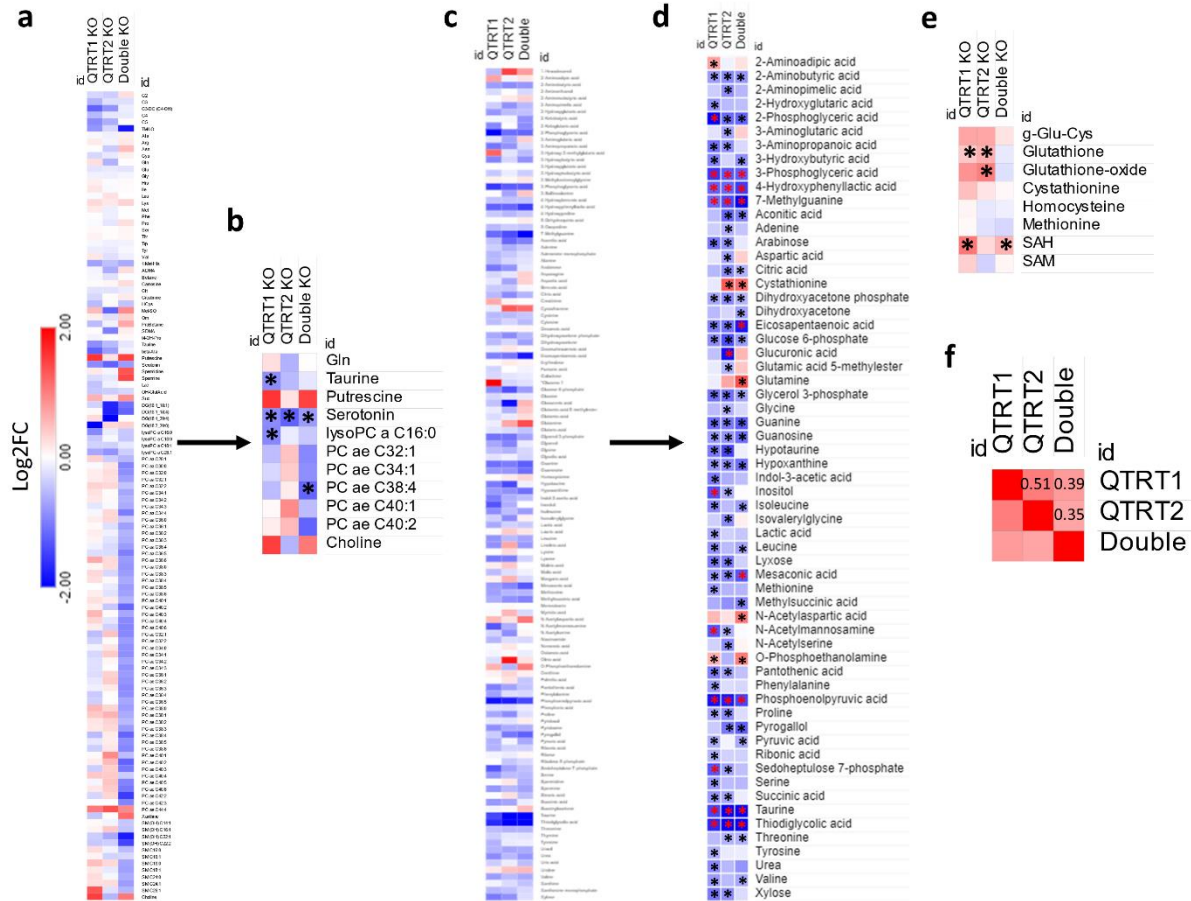

**Supplementary figure 20:** Metabolic pathway analysis in QTRT1 KO cells. **a:** Small molecules database (SMDB) pathway analysis. **b:** Kegg pathway analysis. Statistically significant metabolites used in the enrichment analysis were globally downregulated.

**a**

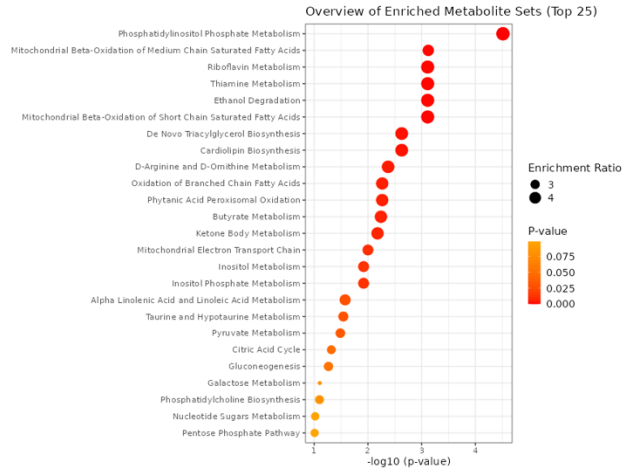

**b**

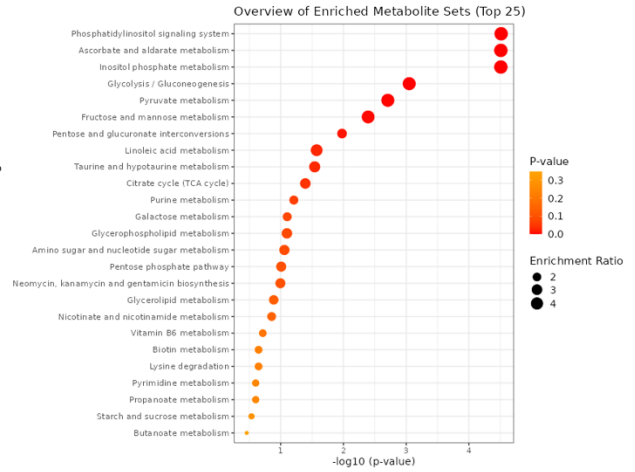

**Supplementary figure 21: Metabolic pathway analysis in QTRT2 KO cells. a: Small molecules database (SMDB) pathway analysis. b: Kegg pathway analysis. Statistically significant metabolites used in the enrichment analysis were globally downregulated.**

**a**

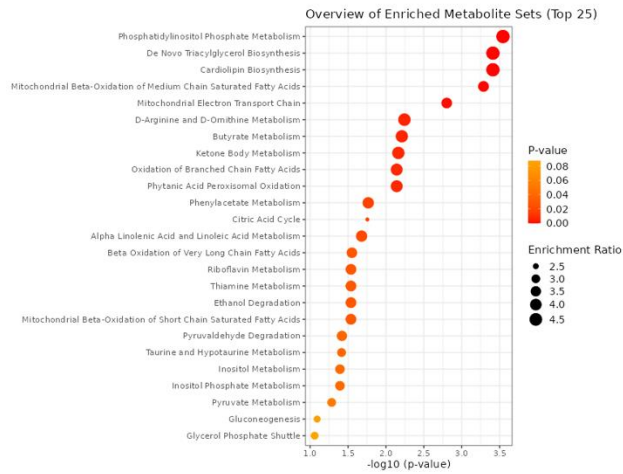

**b**

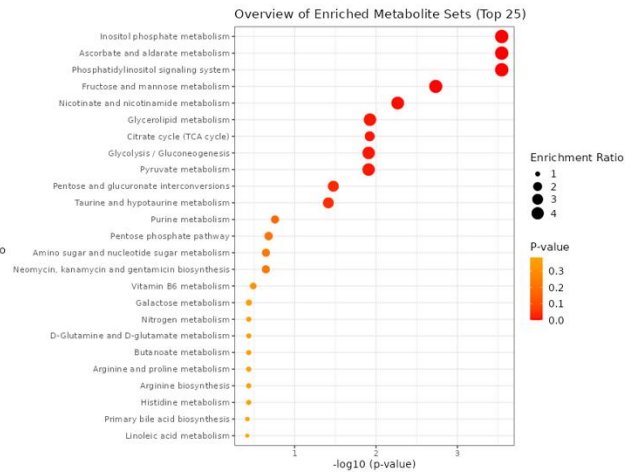



**Supplementary figure 22: Metabolic pathway analysis in Double KO cells. a: Small molecules database (SMDB) pathway analysis. b: Kegg pathway analysis. Statistically significant metabolites used in the enrichment analysis were globally downregulated.**

**a**

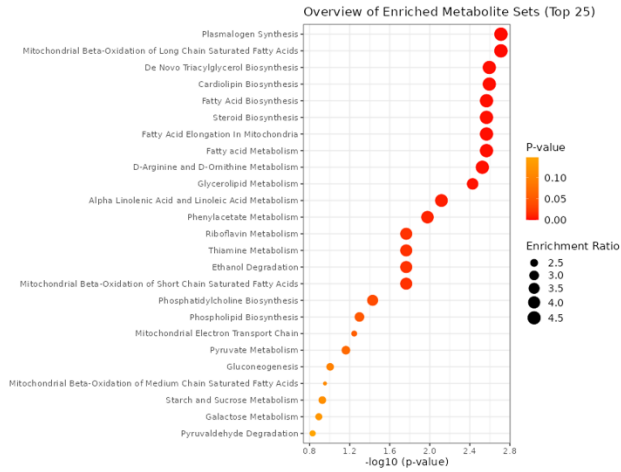

**b**

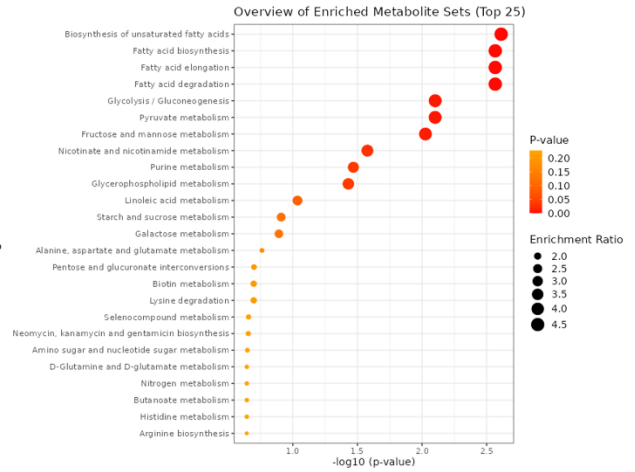

Supplement: media-1.pdf [file media-1.pdf]
